# Supplementary material for: Global analysis of protein aggregation in yeast during physiological conditions and arsenite stress
Source: PubMed Central journal article supplement (PMC4197440; doi:10.1242/bio.20148938), 2014-09-12
Supplement: supp_bio.20148938_bio.20148938-s1.pdf [file supp_bio.20148938_bio.20148938-s1.pdf]

## Supplementary Material

Sebastian Ibstedt et al. doi: 10.1242/bio.20148938

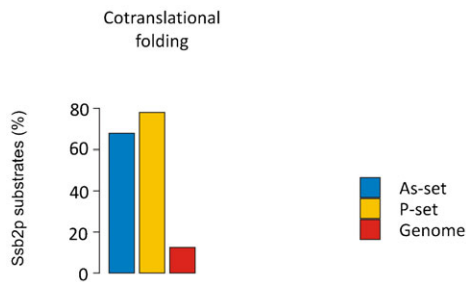

**Fig. S1. Co-translational substrates of ribosome-associated Hsp70 (Ssb2p).** Bars indicate the proportion of aggregated proteins that are co-translational substrates of Ssb2p. Both the As-set (68% of proteins,  $p < 1 \times 10^{-15}$ ) and the P-set (78%,  $p < 1 \times 10^{-15}$ ) have more interactions with Ssb2p than the genome (12%).

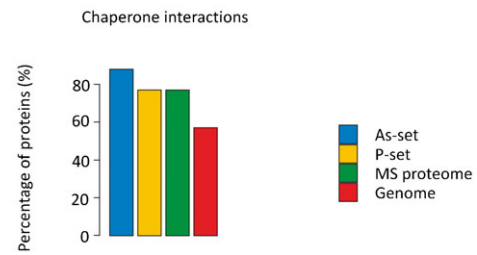

**Fig. S2. Chaperone interactions.** Histograms show the proportions of proteins in the data-sets that interact with chaperones. 88% of the proteins in the As-set interact with at least one chaperone. This is more than the P-set (77%;  $p = 0.028$ ), the MS proteome (77%;  $p = 0.0015$ ) and the genome (57%;  $p = 1 \times 10^{-15}$ ). Comparisons between groups were made with Fisher's exact test.

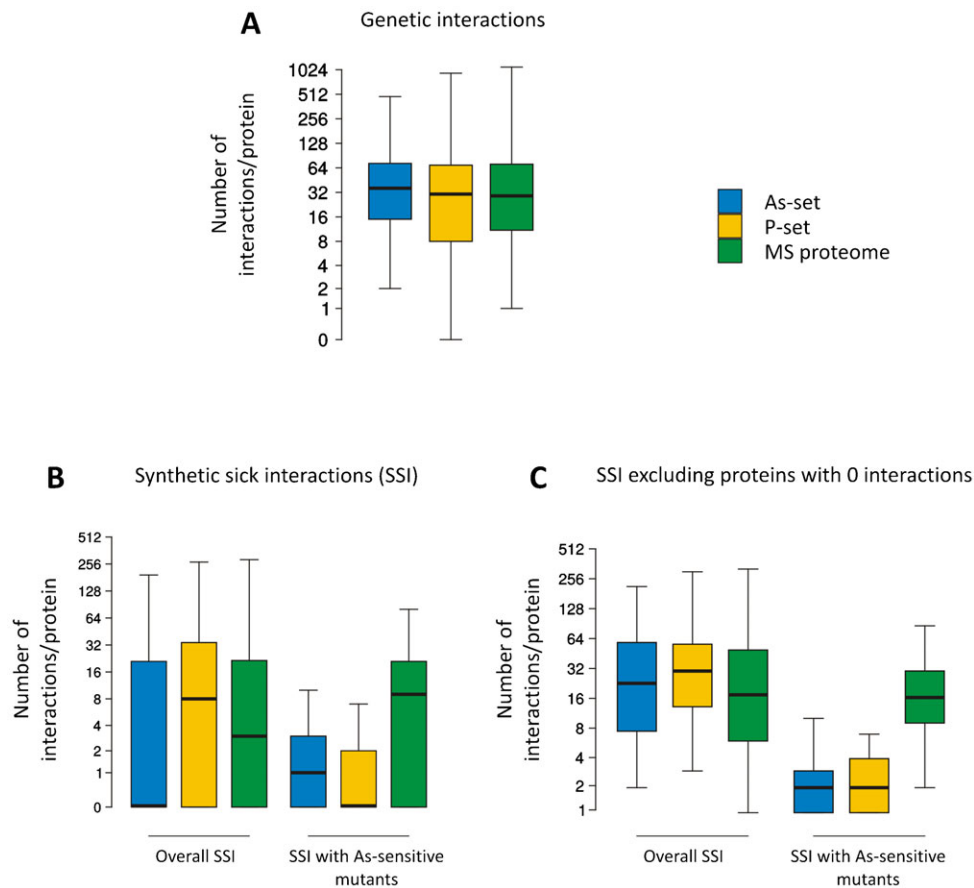

**Fig. S3. Genetic interactions.** (A) Genetic interactions for the As-set, P-set and MS proteome. No significant difference in genetic interactions per protein is seen between the data-sets. (B) Synthetic sick interactions (SSI) for the As-set, P-set and MS proteome. Synthetic sickness was defined as  $|f_{ab} - f_a \times f_b| > 0.088$ , where  $f_{ab}$  is the fitness of the double mutant and  $f_a$  and  $f_b$  is the fitness of the single mutants. The first three boxplots show total SSI per gene, while the last three boxplots show the number of SSI between genes in each data-set and genes whose deletion result in arsenite-induced fitness defects. The P-set has a significantly higher median amount of total SSI (8 per gene) than the MS proteome (3 per gene;  $p = 0.012$ ), but genes in both the As-set and P-set have fewer SSI with genes that contribute to As-tolerance than genes in the MS proteome have. (C) SSI as in panel B) but excluding proteins that lack interactions. The As-set and P-set still have fewer SSI with genes that contribute to As-tolerance than genes in the MS proteome have.

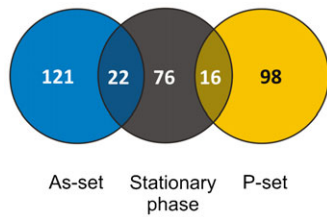

**Fig. S4. Overlap between protein aggregates formed during physiological conditions, arsenite exposure and in stationary phase.** Stationary phase aggregates are largely distinct from aggregates formed during physiological conditions and arsenite exposure.

**Table S2. Essential proteins**

|               | As-set | P-set | MS-proteome |
|---------------|--------|-------|-------------|
| Essential     | 51     | 35    | 375         |
| Non-essential | 92     | 79    | 990         |
| Total         | 143    | 114   | 1365        |
| Essential (%) | 35.7   | 30.7  | 27.5        |

The As-set contains relatively more essential proteins than the MS proteome ( $p = 0.04$ , Fisher's exact test) whereas the P-set is not different from the MS proteome.

**Table S1. Aggregation-prone proteins are predicted to be structurally stable**

|                 | SNA   | SA   | UNA  | UA   | tot  |
|-----------------|-------|------|------|------|------|
| <b>Absolute</b> |       |      |      |      |      |
| As              | 35    | 8    | 11   | 1    | 143  |
| P               | 20    | 6    | 1    | 0    | 114  |
| MS              | 241   | 103  | 83   | 57   | 1475 |
| tot             | 716   | 711  | 198  | 197  |      |
| <b>Relative</b> |       |      |      |      |      |
| As              | 24.5% | 5.6% | 7.7% | 0.7% |      |
| P               | 17.5% | 5.3% | 0.9% | 0.0% |      |
| MS              | 16.3% | 7.0% | 5.6% | 3.9% |      |

The majority of the aggregation-prone proteins that we identified are predicted to be structured according to the classification by (Gsponer and Babu, 2012) and the arsenite-aggregated proteins (As-set) are significantly enriched in the SNA category. SNA: highly structured proteins without non-aggregation prone elements; SA: highly structured proteins with hydrophobic domains that are likely to form  $\beta$ -sheet aggregates; UNA: unstructured proteins with K/E-rich stretches that decrease aggregation propensity; UA: unstructured aggregation-prone proteins with Q/N-rich stretches.
